# Supplementary material for: A novel self-enhanced electrochemiluminescence immunosensor based on hollow Ru-SiO2@PEI nanoparticles for NSE analysis
Source: PubMed Central journal article supplement (PMC4768085; doi:10.1038/srep22234), 2016-02-26
Supplement: srep22234-s1.pdf [file srep22234-s1.pdf]

# Supporting Information

A novel self-enhanced electrochemiluminescence immunosensor based on hollow Ru-SiO<sub>2</sub>@PEI nanoparticles for NSE analysis

Limin Zhou<sup>1,2</sup>, Jianshe Huang<sup>1</sup>, Bin Yu<sup>1,3</sup>, Tianyan You<sup>1\*</sup>

<sup>1</sup>State Key Laboratory of Electroanalytical Chemistry, Changchun Institute of Applied Chemistry, Chinese Academy of Sciences, Changchun, 130022, China

<sup>2</sup>University of the Chinese Academy of Sciences, Beijing, 100049, China

<sup>3</sup>National Engineering Laboratory for AIDS Vaccine, School of Life Sciences, Jilin University, Changchun, 130012, China

## Corresponding Author

\* Tel: +86-431-85262850.

Fax: +86-431-85262850.

E-mail address: youty@ciac.ac.cn.

1. Zeta potential of Ru-SiO<sub>2</sub> and Ru-SiO<sub>2</sub>@PEI nanoparticles

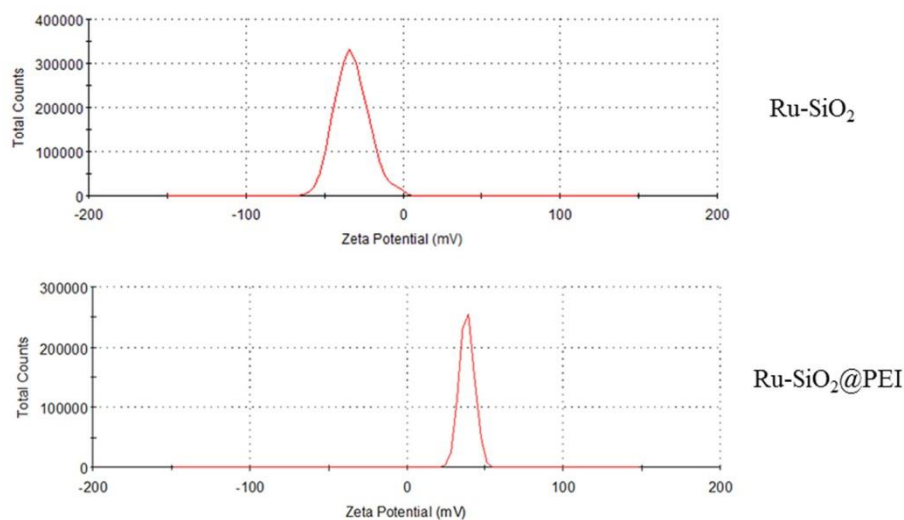

Figure S1 Zeta potential of Ru-SiO<sub>2</sub> and Ru-SiO<sub>2</sub>@PEI nanoparticles

2. Nitrogen adsorption-desorption isotherm and BJH pore size distribution of Ru-SiO<sub>2</sub> and Ru-SiO<sub>2</sub>@PEI nanoparticles

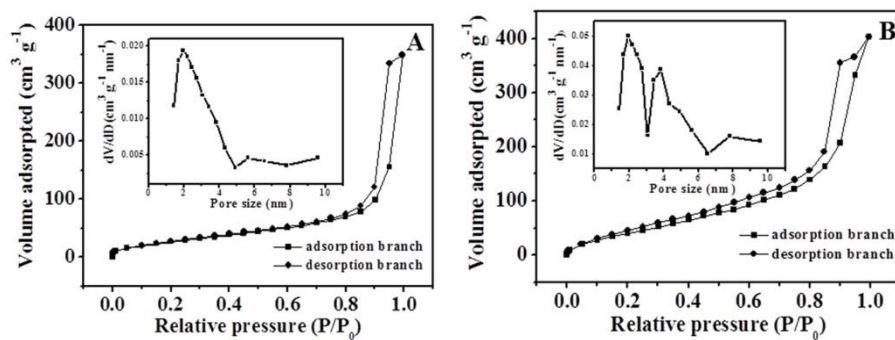

Figure S2 Nitrogen adsorption-desorption isotherm for Ru-SiO<sub>2</sub> and Ru-SiO<sub>2</sub>@PEI nanoparticles. Inset: BJH pore diameter distribution.

3. TEM images of Ru-SiO<sub>2</sub>@PEI nanoparticles by interacting Ru-SiO<sub>2</sub> nanoparticles with different concentration of PEI

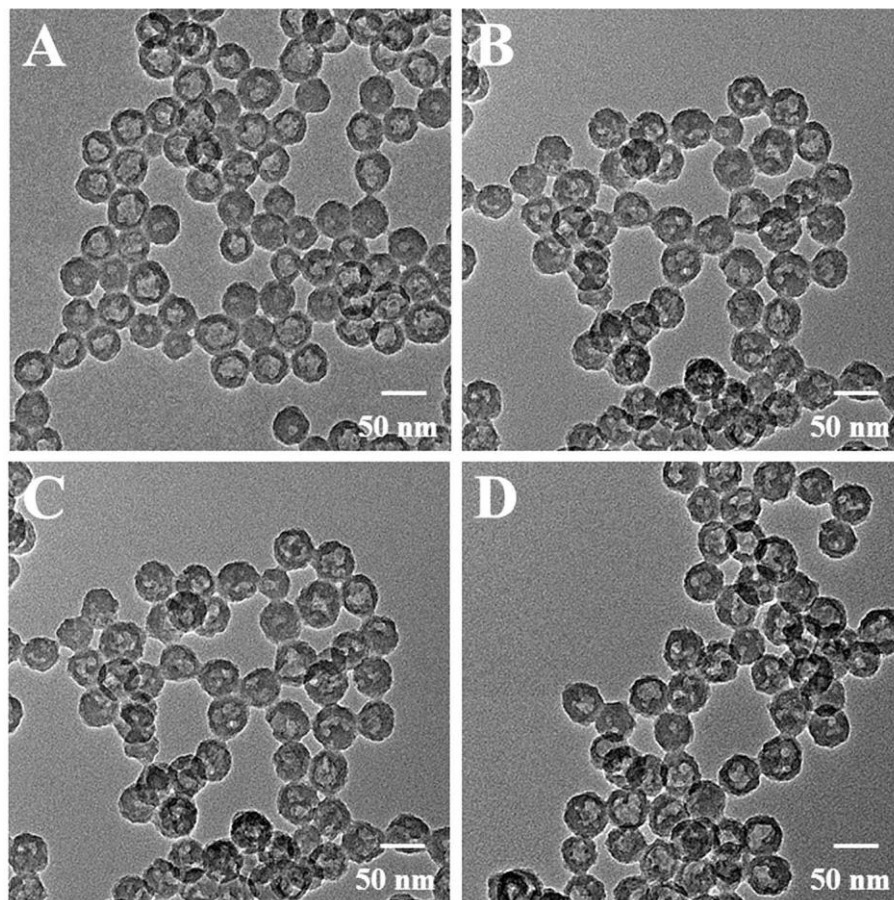

Figure S3 TEM images of Ru-SiO<sub>2</sub>@PEI nanoparticles by interacting Ru-SiO<sub>2</sub> nanoparticles with (A) 5 mg mL<sup>-1</sup>, (B) 15 mg mL<sup>-1</sup>, (C) 25 mg mL<sup>-1</sup> and (D) 40 mg mL<sup>-1</sup> PEI for 12h.

#### 4. Optimization of experimental parameter

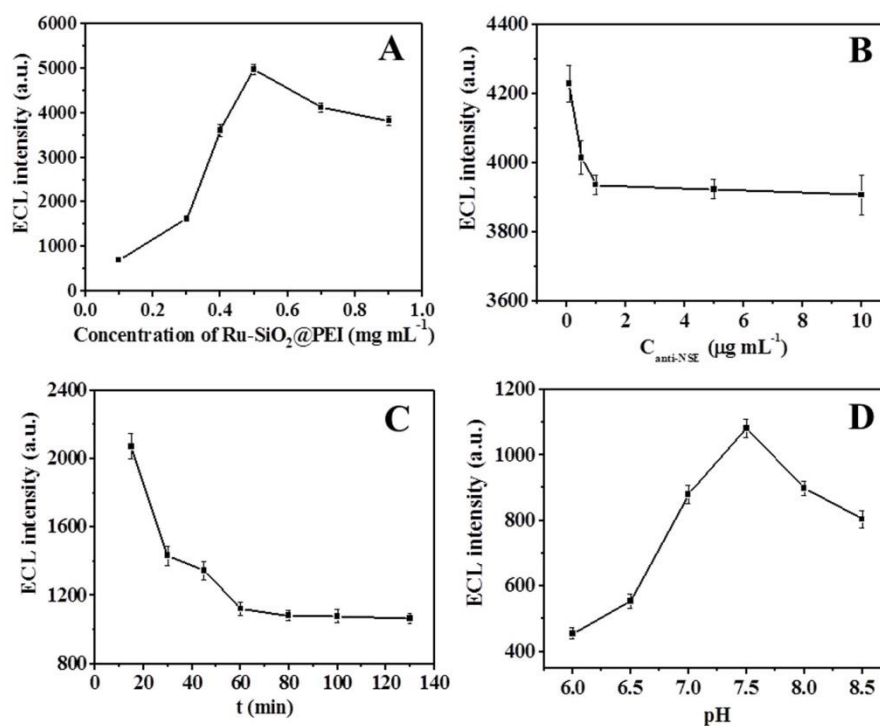

Figure S4 The effects of (A) concentration of Ru-SiO<sub>2</sub>@PEI nanoparticles, (B) the concentration of the anti-NSE, (C) incubation time and (D) pH value on the ECL intensity. The immunosensor was incubated with  $1.0 \times 10^{-9}$  mg mL<sup>-1</sup> NSE antigen. The ECL response was determined in 0.1M PBS (pH 7.5); Scan rate: 100 mV s<sup>-1</sup>. Scan potential: 0~1.35V
